# Supplementary material for: Efficacy and Safety of Panitumumab in Patients With RAF/RAS-Wild-Type Glioblastoma: Results From the Drug Rediscovery Protocol
Source: PubMed Central journal article supplement — Oncologist. 2023 Dec 18;29(5):431–40. doi: 10.1093/oncolo/oyad320 (PMC11067815; doi:10.1093/oncolo/oyad320), 2023-12-18

**Supplementary Figure 1A and 1B – Progression-free survival and overall survival curves for *IDHwt* glioblastomas**

Kaplan-Meijer curve for estimated progression-free survival (1A) and overall survival (1B), with 95% confidence interval (dashed lines)

**1A. Progression-free survival**

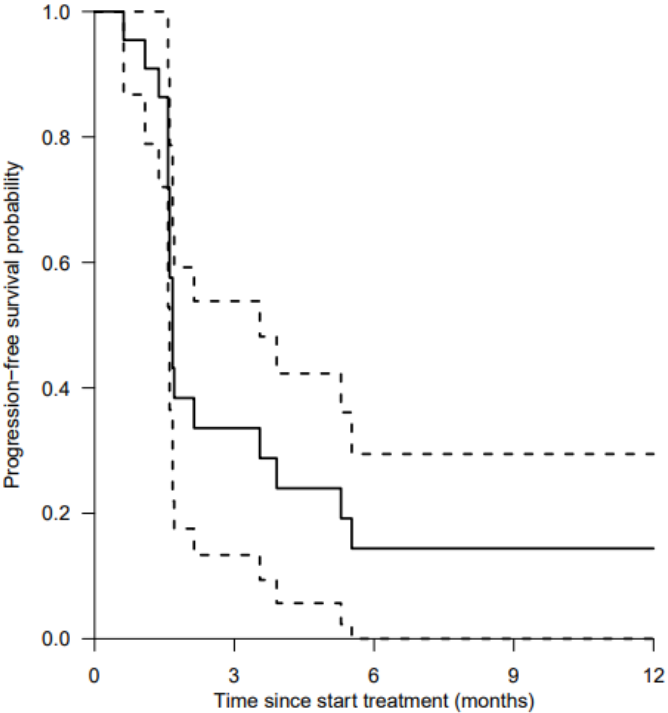

**1B. Overall survival**

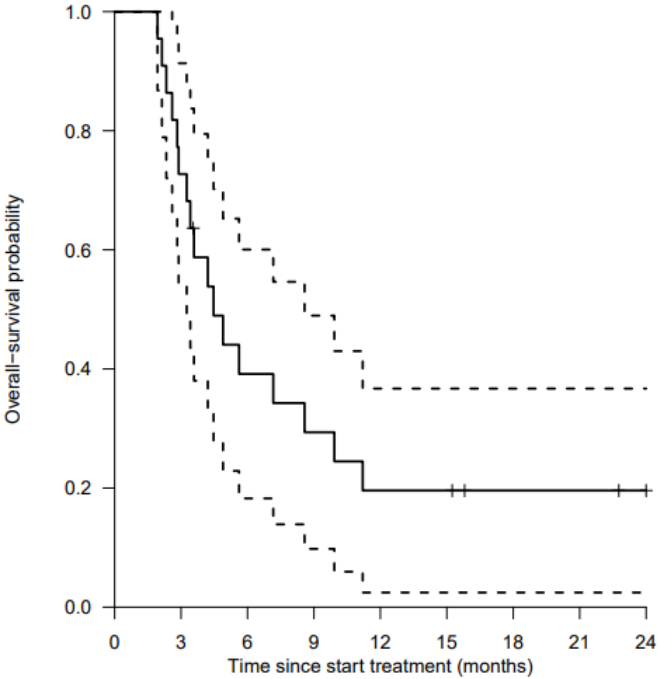

Supplement: oyad320_suppl_supplementary_figures_1.pdf [file oyad320_suppl_supplementary_figures_1.pdf]
